# Supplementary material for: Prescription of Second-Generation Antipsychotics: Responding to Treatment Risk in Real-World Practice
Source: Atypon-hosted journal article supplement (doi:10.1176/appi.ps.201200183), 2012-12-17
Supplement: 238_ds001.pdf [file 238_ds001.pdf]

## Bivariate analysis of new second generation antipsychotic prescriptions by any cardio-metabolic disorder

| Variable           | Any Cardio-metabolic disorder |             | X <sup>2</sup> | df | p-value |    |     |
|--------------------|-------------------------------|-------------|----------------|----|---------|----|-----|
|                    | Yes                           |             |                |    |         | No |     |
|                    | n=1650 (63%)                  | n=963 (37%) |                |    |         | n  | (%) |
| Medication         |                               |             | 13.29          | 5  | .021    |    |     |
| Olanzapine         | 242 (15)                      | 167 (17)    |                |    |         |    |     |
| Quetiapine         | 745 (45)                      | 471 (49)    |                |    |         |    |     |
| Risperidone oral   | 297 (18)                      | 138 (14)    |                |    |         |    |     |
| LAI Risperidone    | 20 ( 1)                       | 14 ( 2)     |                |    |         |    |     |
| Aripiprazole       | 264 (16)                      | 126 (13)    |                |    |         |    |     |
| Ziprazidone        | 82 ( 5)                       | 47 ( 5)     |                |    |         |    |     |
| Reasons            |                               |             |                |    |         |    |     |
| Intolerance        | 192 (68)                      | 91 (32)     | 4.21           | 1  | .040    |    |     |
| Less EPS           | 210 (61)                      | 133 (39)    | .21            | 1  | .642    |    |     |
| Less TD Risk       | 157 (64)                      | 88 (36)     | .36            | 1  | .548    |    |     |
| Less Akathisia     | 75 (58)                       | 54 (42)     | 1.02           | 1  | .311    |    |     |
| Less Sedation      | 89 (61)                       | 58 (40)     | .21            | 1  | .644    |    |     |
| Efficacy           | 694 (62)                      | 427 (38)    | .17            | 1  | .678    |    |     |
| Treatment of TD    | 9 (64)                        | 5 (36)      | .02            | 1  | .880    |    |     |
| Sleep/Sedation     | 431 (61)                      | 276 (39)    | .83            | 1  | .362    |    |     |
| Patient Preference | 442 (62)                      | 270 (38)    | .03            | 1  | .867    |    |     |
